# Supplementary figures and images for: Iridium complexes containing p-phenylene units. The influence of the conjugation on the excited state properties
Source: Royal Society of Chemistry journal article supplement (doi:10.1039/b503065j), 2005-01-01

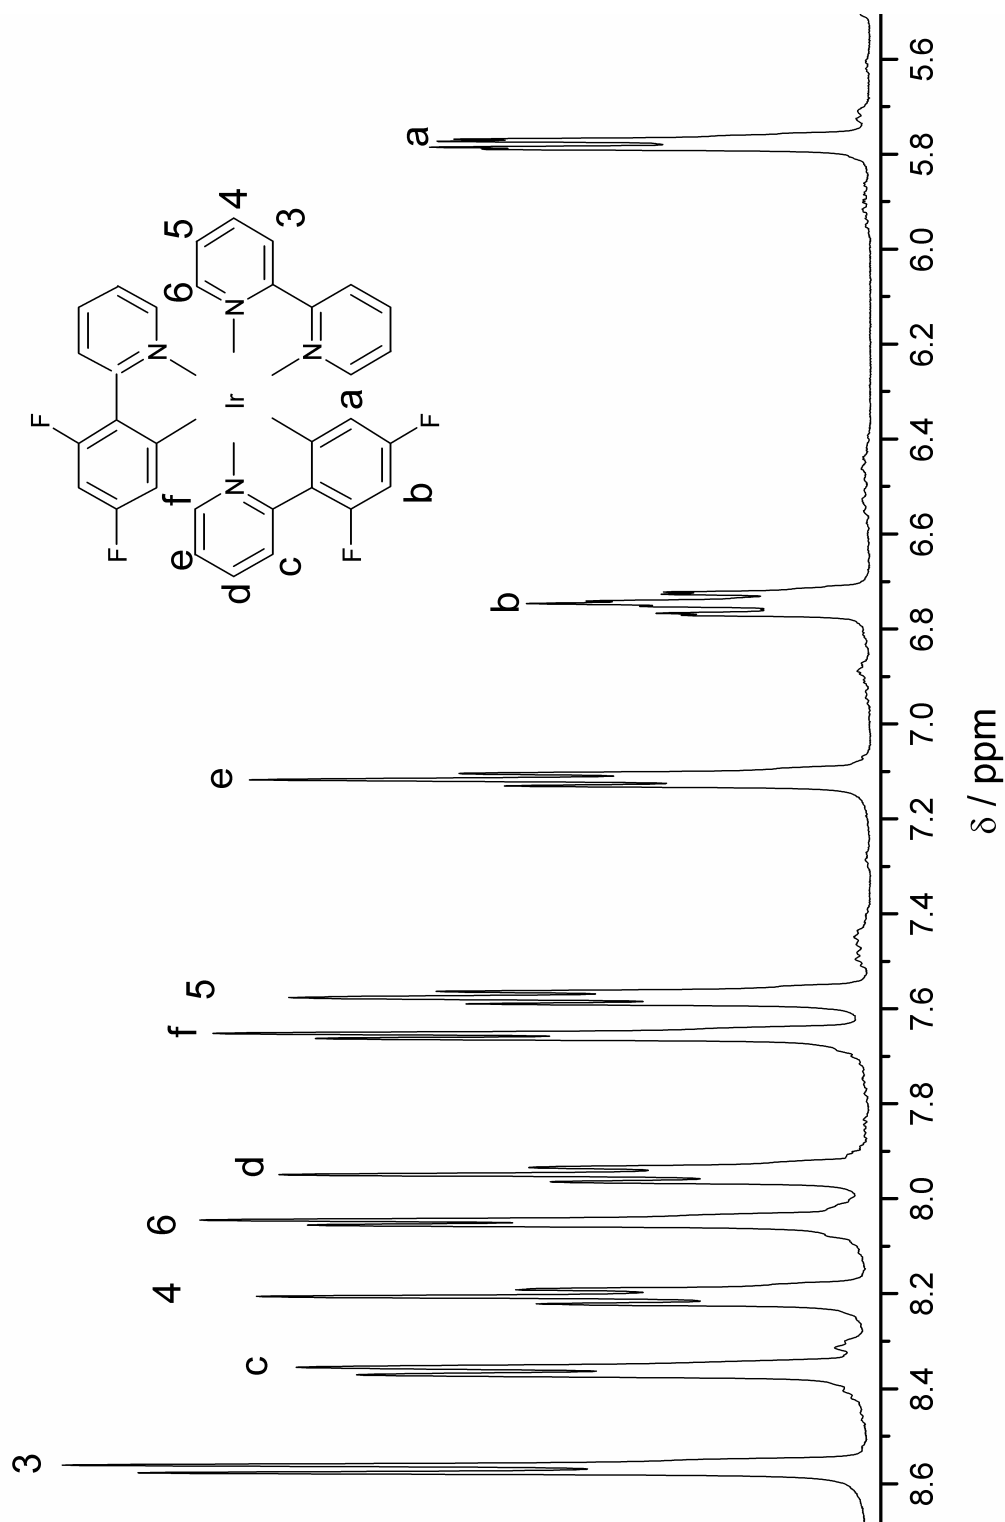

SI 1 :  $^1\text{H}$  NMR spectrum of  $[\text{Ir}(\text{ppyFF})_2\text{bpy}]^+$  in  $\text{CD}_2\text{Cl}_2$  at 499.88 MHz

Supplement: b503065j.pdf [file b503065j.pdf]
